# Supplementary material for: Long-Term Temporal Analysis of the Human Fecal Microbiota Revealed a Stable Core of Dominant Bacterial Species
Source: PubMed Central journal article supplement (PMC3712949; doi:10.1371/journal.pone.0069621), 2013-07-16
Supplement: pone.0069621.s002.pdf [file pone.0069621.s002.pdf]

Subject 1

Subject 2

Subject 3

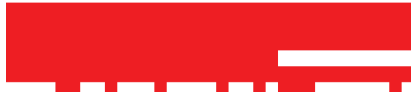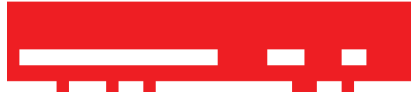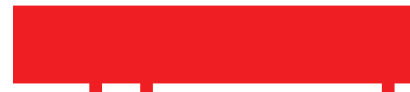

Firmicutes  
Bacteroidetes  
Actinobacteria  
Verrucomicrobia  
Proteobacteria  
Cyanobacteria

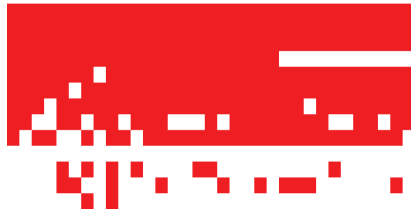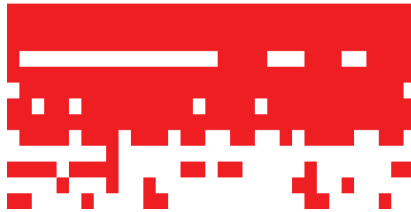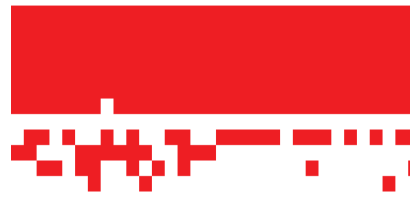

Clostridia  
Bacteroidia  
Actinobacteria  
Verrucomicrobiae  
Erysipelotrichi  
Bacilli  
Betaproteobacteria  
Deltaproteobacteria  
Gammaproteobacteria  
Sphingobacteria  
Alphaproteobacteria  
Cyanobacteria  
Flavobacteria

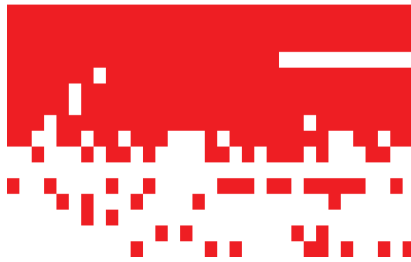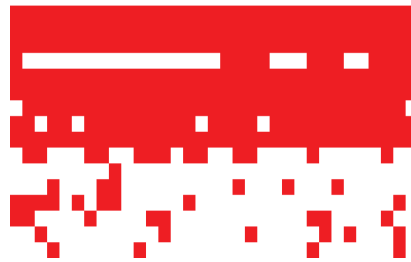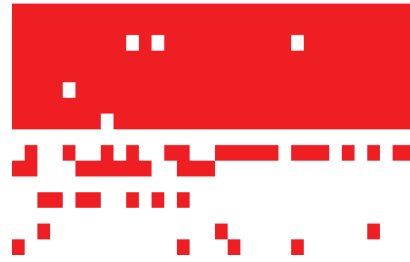

Clostridiales  
Bacteroidales  
Bifidobacteriales  
Verrucomicrobiales  
Erysipelotrichales  
Coriobacteriales  
Lactobacillales  
Burkholderiales  
Desulfovibrionales  
Enterobacteriales  
Sphingobacteriales  
Pasteurellales  
Rhizobiales  
Flavobacteriales  
Pseudomonadales  
Actinomycetales

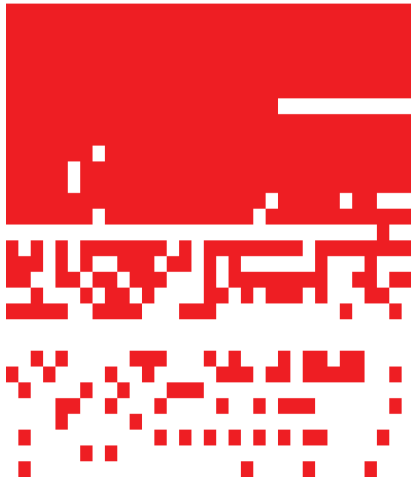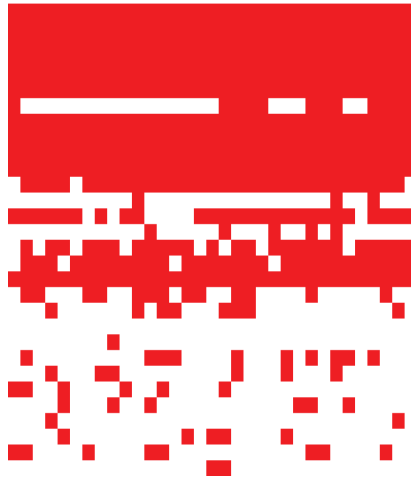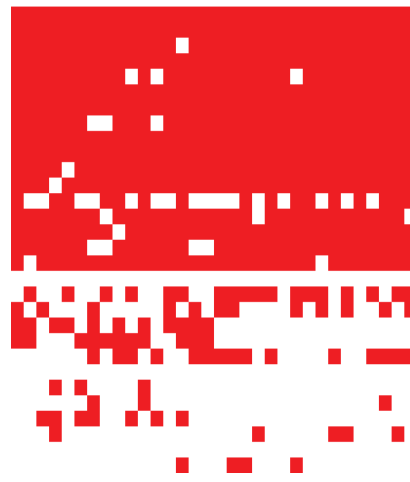

Lachnospiraceae  
Ruminococcaceae  
Bacteroidaceae  
Incertae Sedis XIV  
Bifidobacteriaceae  
Rikenellaceae  
Verrucomicrobiaceae  
Porphyromonadaceae  
Veillonellaceae  
Erysipelotrichaceae  
Coriobacteriaceae  
Streptococcaceae  
Eubacteriaceae  
Peptostreptococcaceae  
Prevotellaceae  
Alcaligenaceae  
Incertae Sedis XIII  
Desulfovibrionaceae  
Enterobacteriaceae  
Clostridiaceae  
Burkholderiaceae  
Chitinophagaceae  
Leuconostocaceae  
Pasteurellaceae  
Comamonadaceae  
Chloroplast  
Bradyrhizobiaceae  
Carnobacteriaceae  
Flavobacteriaceae  
Incertae Sedis XI

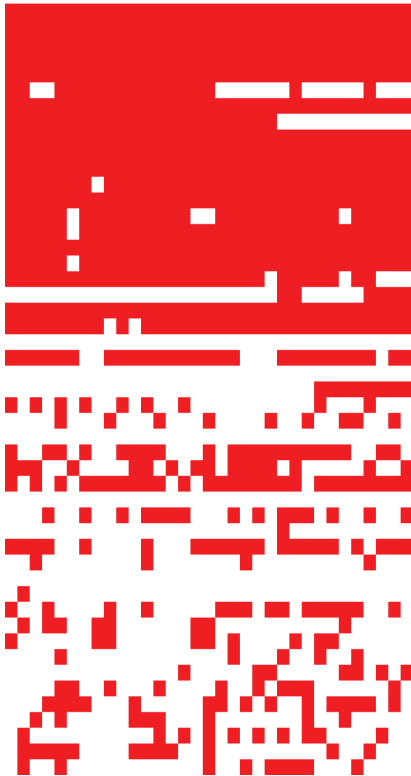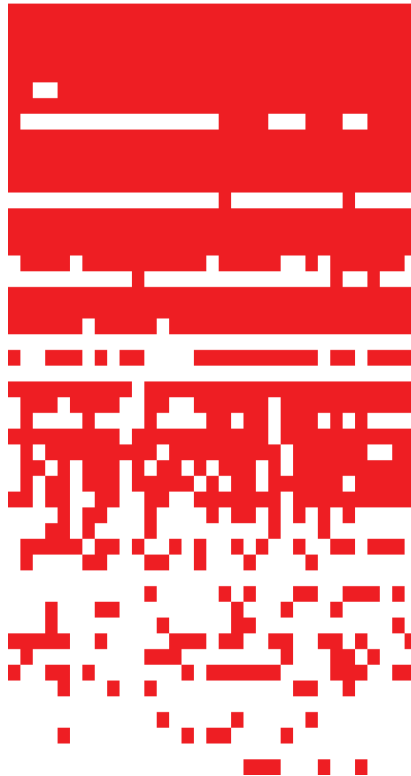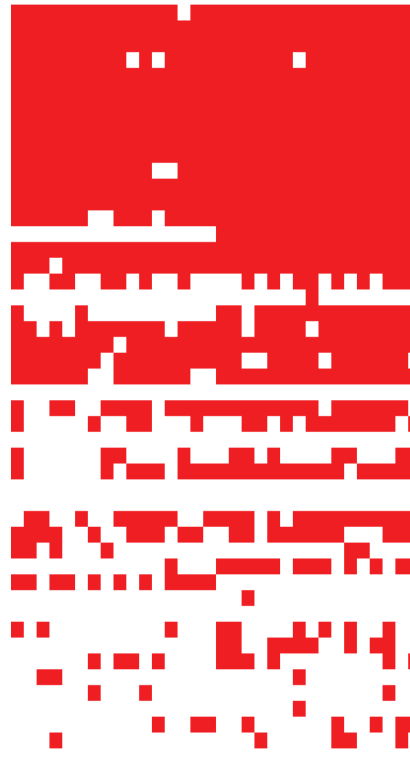

*Bacteroides*  
*Blautia*  
*Faecalibacterium*  
*Bifidobacterium*  
*Roseburia*  
*Ruminococcus*  
*Alistipes*  
*Akkermansia*  
*Dorea*  
*Subdoligranulum*  
*Coproccoccus*  
*Coprobacillus*  
*Dialister*  
*Parabacteroides*  
*Collinsella*  
*Oscillibacter*  
*Streptococcus*  
*Eubacterium*  
*Phascolarctobacterium*  
*Odonibacter*  
*Butyricoccus*  
*Paraprevotella*  
*Sporacetigenium*  
*Parasutterella*  
*Barnesiella*  
*Anaerovorax*  
*Lactococcus*  
*Desulfovibrio*  
*Turicibacter*  
*Anaerotruncus*  
*Sutterella*  
*Butyricimonas*  
*Holdemania*  
*Asaccharobacter*  
*Pseudobutyrvibrio*  
*Escherichia/Shigella*  
*Ralstonia*  
*Porphyromonas*  
*Haemophilus*  
*Clostridium*  
*Syntrophococcus*  
*Weissella*  
*Egerthella*  
*Streptophyta*  
*Veillonella*  
*Leuconostoc*  
*Granulicatella*  
*Acidaminococcus*  
*Lawsonia*
