# Supplementary material for: Long-Term Temporal Analysis of the Human Fecal Microbiota Revealed a Stable Core of Dominant Bacterial Species
Source: PubMed Central journal article supplement (PMC3712949; doi:10.1371/journal.pone.0069621), 2013-07-16
Supplement: pone.0069621.s004.pdf [file pone.0069621.s004.pdf]

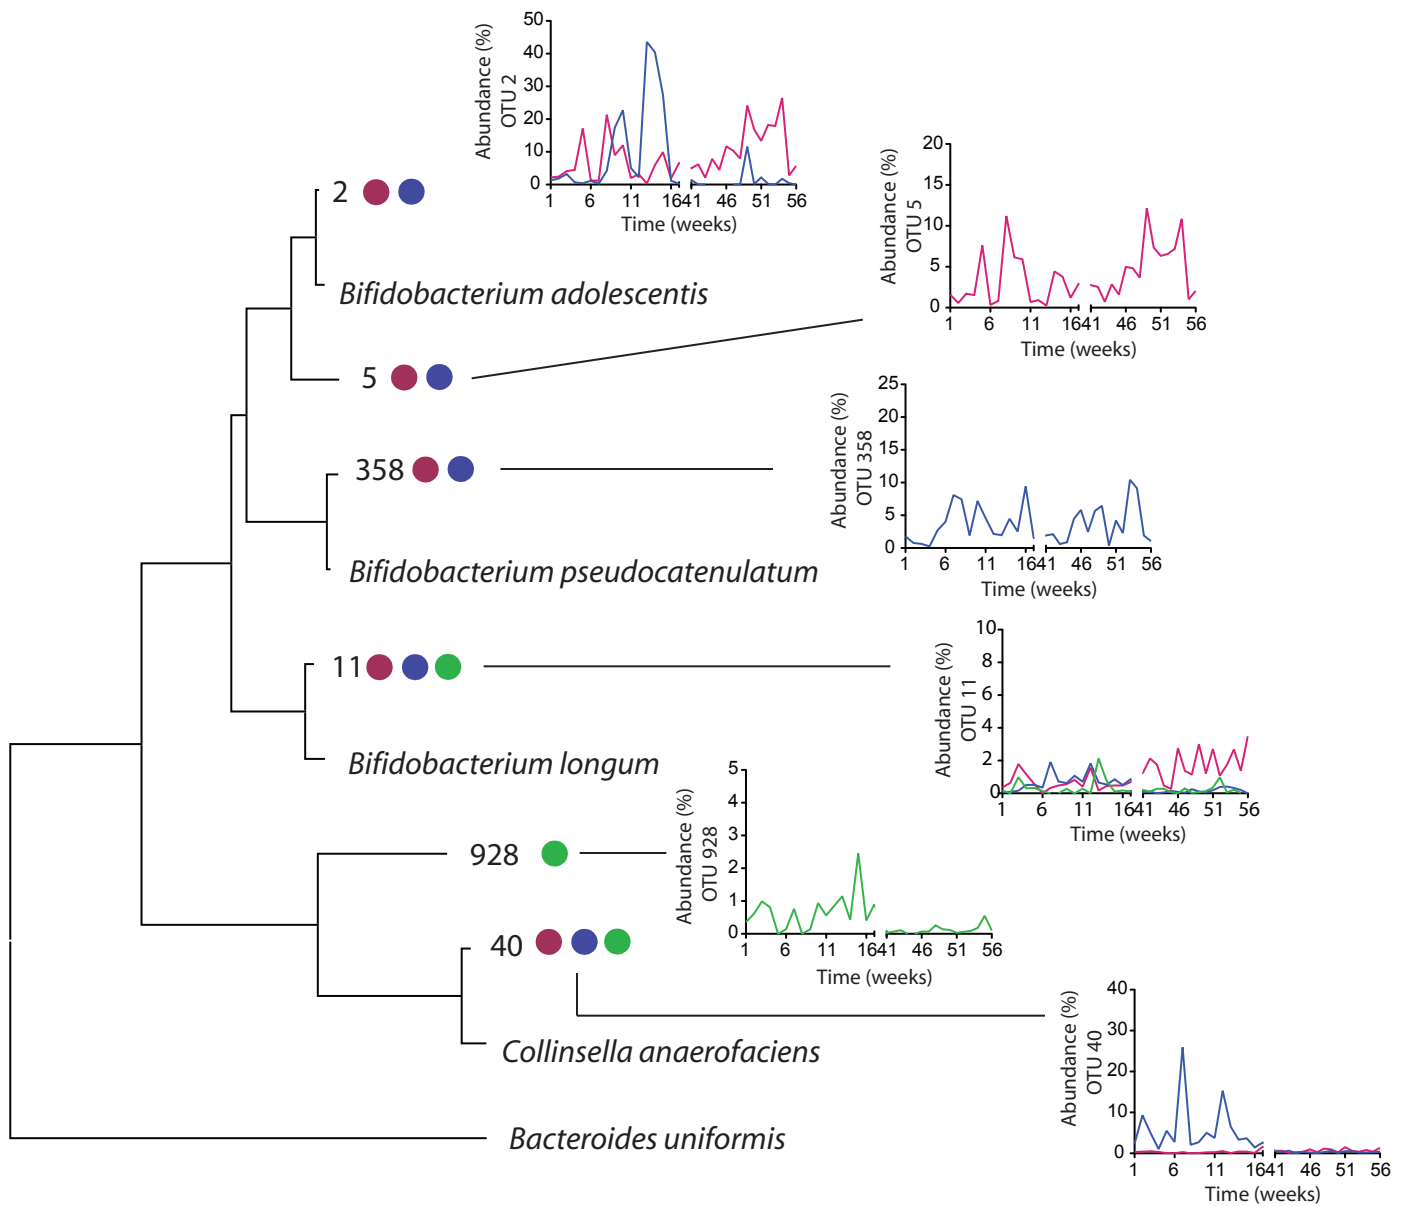

0.05

- S1
- S2
- S3
