# Supplementary material for: Long-Term Temporal Analysis of the Human Fecal Microbiota Revealed a Stable Core of Dominant Bacterial Species
Source: PubMed Central journal article supplement (PMC3712949; doi:10.1371/journal.pone.0069621), 2013-07-16
Supplement: pone.0069621.s008.pdf [file pone.0069621.s008.pdf]

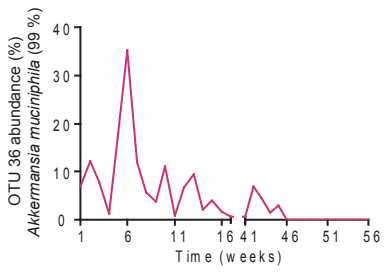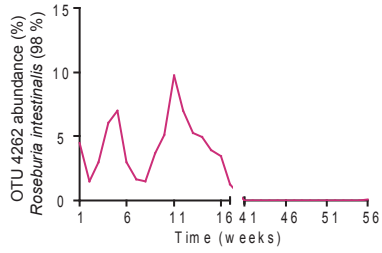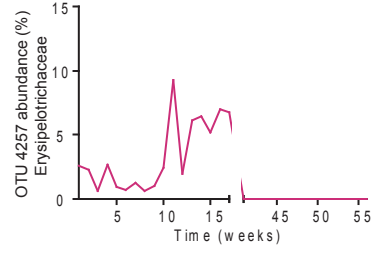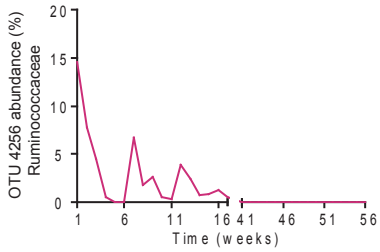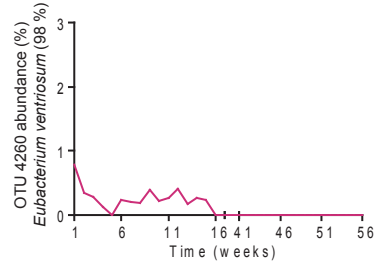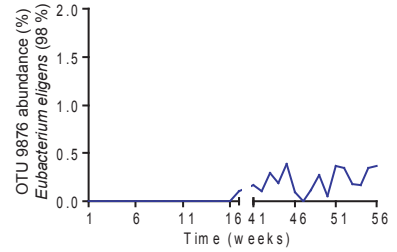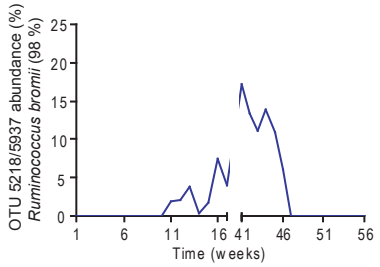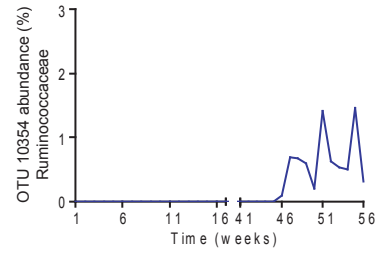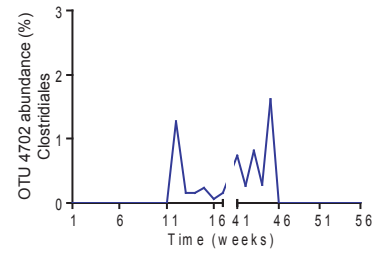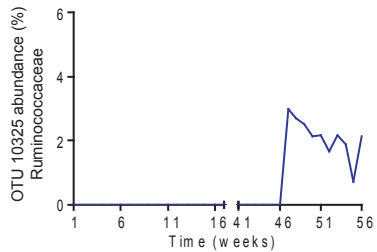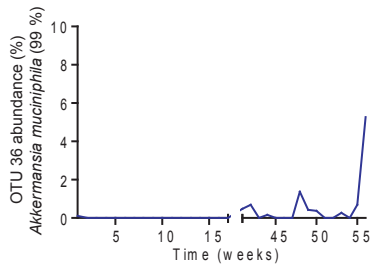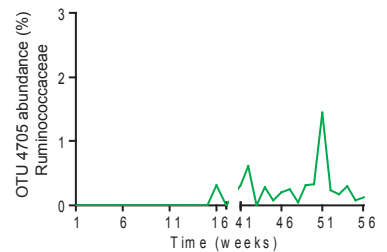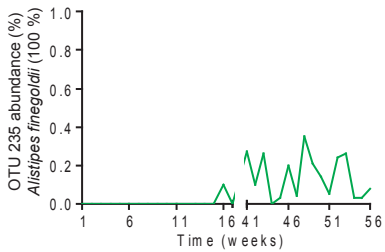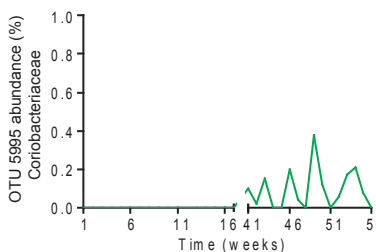

● S1  
● S2  
● S3
